# Supplementary material
Source: PubMed Central journal article supplement (PMC8020500)
Supplement: Supp_Table1.pdf [file Supp_Table1.pdf]

**Supplementary Table S1. Prestudy and Poststudy Confidence in Diagnosis and Management of Dermatology Conditions**

|                            | PRESTUDY CONFIDENCE         | POSTSTUDY CONFIDENCE           | CHANGE          | <i>p</i> |
|----------------------------|-----------------------------|--------------------------------|-----------------|----------|
| Overall                    |                             |                                |                 |          |
| Mean (SD) diagnosis        | 3.36 (1.09)                 | 3.70 (1.08)                    | 0.31 (0.85)     | <0.01    |
| Median (Q1, Q3)            | 4.0 (3.0, 4.0)              | 4.0 (3.0, 5.0)                 | 0.0 (0.0, 1.0)  |          |
| Mean (SD) management       | 3.21 (1.09)                 | 3.60 (1.19)                    | 0.48 (0.83)     | <0.01    |
| Median (Q1, Q3)            | 3.0 (2.0, 4.0)              | 4.0 (3.0, 5.0)                 | 0.0 (0.0, 1.0)  |          |
| Education                  |                             |                                |                 |          |
| Mean (SD) diagnosis        | 3.63 (0.99)                 | 3.83 (1.00)                    | 0.20 (0.93)     | 0.14     |
| Median (Q1, Q3)            | 4.0 (3.0, 4.0)              | 4.0 (3.0, 5.0)                 | 0.0 (0.0, 1.0)  |          |
| Mean (SD) management       | 3.42 (1.03)                 | 3.82 (1.10)                    | 0.52 (0.98)     | <0.01    |
| Median (Q1, Q3)            | 4.0 (3.0, 4.0)              | 4.0 (3.0, 5.0)                 | 0.50 (0.0, 1.0) |          |
| Noneducation               |                             |                                |                 |          |
| Mean (SD) diagnosis        | 3.02 (1.12)                 | 3.54 (1.16)                    | 0.45 (0.72)     | <0.01    |
| Median (Q1, Q3)            | 3.0 (2.0, 4.0)              | 4.0 (3.0, 4.0)                 | 0.0 (0.0, 1.0)  |          |
| Mean (SD) management       | 2.95 (1.12)                 | 3.33 (1.25)                    | 0.42 (0.60)     | <0.01    |
| Median (Q1, Q3)            | 3.0 (2.0, 4.0)              | 3.0 (3.0, 4.0)                 | 0.0 (0.0, 1.0)  |          |
| EDUCATION VS. NONEDUCATION | EDUCATION CONFIDENCE CHANGE | NONEDUCATION CONFIDENCE CHANGE | CHANGE          | <i>p</i> |
| Mean (SD) diagnosis        | 0.20 (0.93)                 | 0.45 (0.72)                    | 0.31 (0.85)     | 0.26     |
| Median (Q1, Q3)            | 0.0 (0.0, 1.0)              | 0.0 (0.0, 1.0)                 | 0.0 (0.0, 1.0)  |          |
| Mean (SD) management       | 0.52 (0.98)                 | 0.42 (0.60)                    | 0.48 (0.83)     | 0.58     |
| Median (Q1, Q3)            | 0.50 (0.0, 1.0)             | 0.0 (0.0, 1.0)                 | 0.0 (0.0, 1.0)  |          |
