# Supplementary material
Source: PubMed Central journal article supplement (PMC8020500)

## Supplementary Data

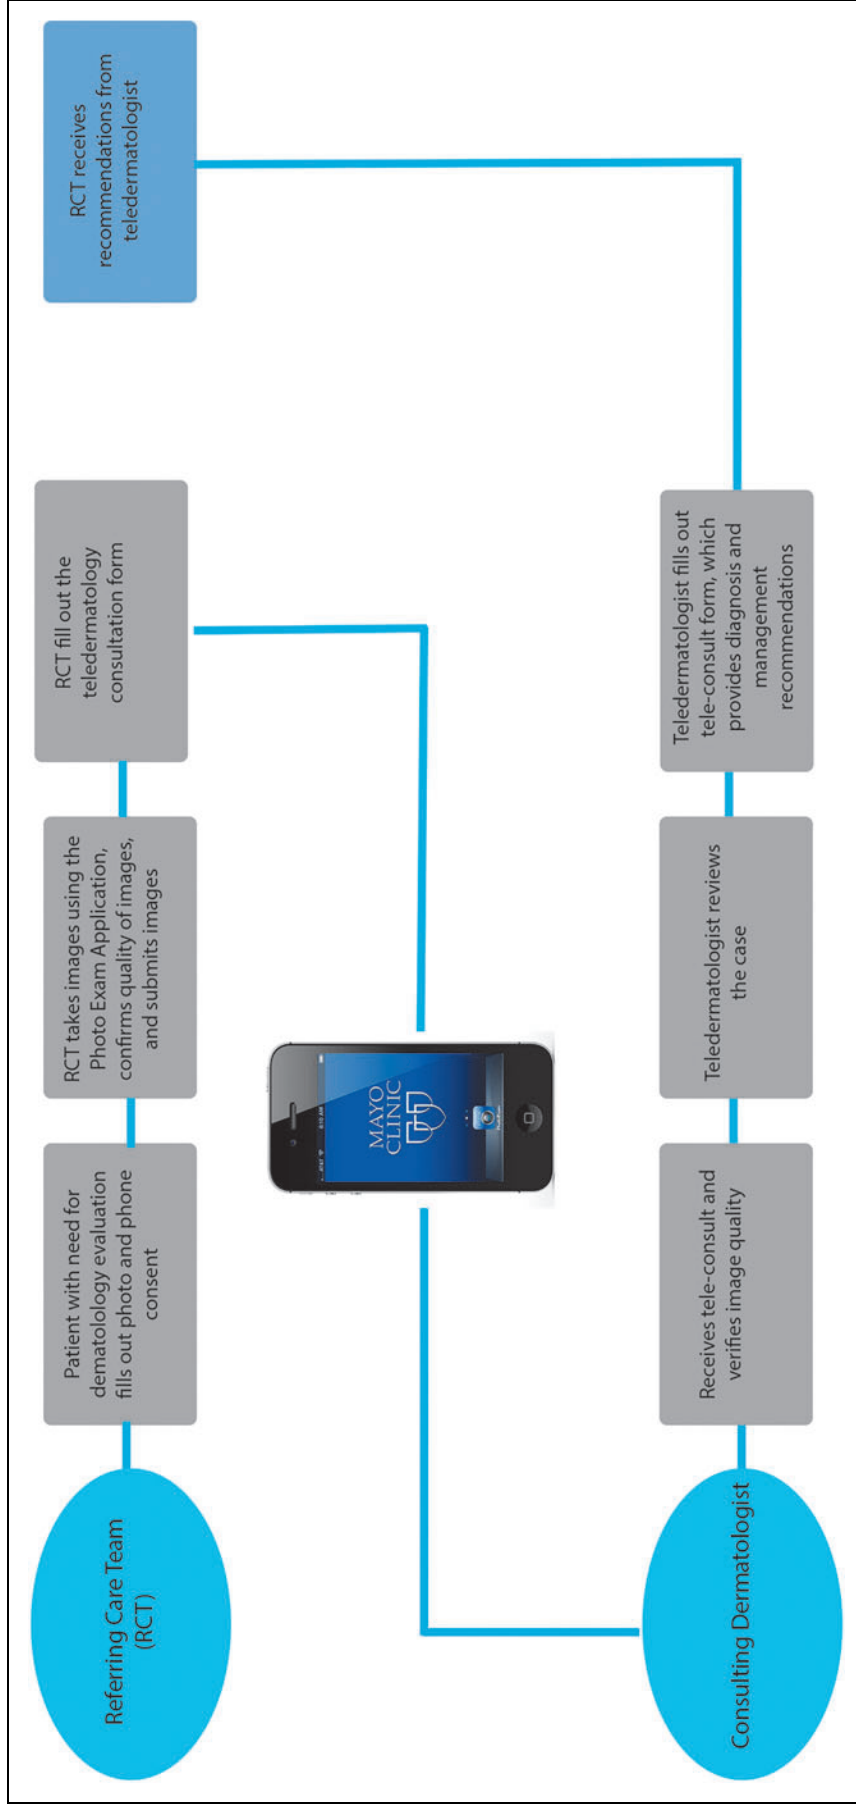

Supplementary Figure S1. Teledermatology workflow.

Supplement: Supp_Fig1.pdf [file Supp_Fig1.pdf]
